# Supplementary material
Source: MDPI journal article supplement (https://www.mdpi.com/2311-5637/9/4/383)
Supplement: s1 [file s1=3fversion=3d1681696243]

## Supplemental files

**Table S1.** Amino acid composition for the fermented feed

| Amino acid type          | Raw materials (%)         | Fermented feed (%)        | Percentage change |
|--------------------------|---------------------------|---------------------------|-------------------|
| Essential amino acid     |                           |                           |                   |
| Isoleucine               | 0.72 ± 0.08 <sup>b</sup>  | 0.93 ± 0.07 <sup>a</sup>  | 0.21              |
| Threonine                | 0.58 ± 0.06 <sup>b</sup>  | 0.74 ± 0.04 <sup>a</sup>  | 0.16              |
| Valine                   | 0.84 ± 0.15 <sup>b</sup>  | 1.02 ± 0.13 <sup>a</sup>  | 0.18              |
| Methionine               | 0.35 ± 0.13 <sup>b</sup>  | 0.48 ± 0.09 <sup>a</sup>  | 0.13              |
| Leucine                  | 1.64 ± 0.04 <sup>b</sup>  | 2.00 ± 0.05 <sup>a</sup>  | 0.36              |
| Phenylalanine            | 0.83 ± 0.11 <sup>b</sup>  | 0.97 ± 0.13 <sup>a</sup>  | 0.14              |
| Histidine                | 0.51 ± 0.05 <sup>b</sup>  | 0.61 ± 0.07 <sup>a</sup>  | 0.10              |
| Arginine                 | 0.91 ± 0.09 <sup>b</sup>  | 1.06 ± 0.11 <sup>a</sup>  | 0.15              |
| Lysine                   | 0.86 ± 0.06 <sup>b</sup>  | 0.98 ± 0.03 <sup>a</sup>  | 0.12              |
| non-essential amino acid |                           |                           |                   |
| Alanine                  | 0.80 ± 0.15 <sup>b</sup>  | 1.08 ± 0.15 <sup>a</sup>  | 0.28              |
| Aspartic Acid            | 1.52 ± 0.16 <sup>b</sup>  | 1.85 ± 0.15 <sup>a</sup>  | 0.33              |
| Tyrosine                 | 0.49 ± 0.14               | 0.49 ± 0.03               | 0.00              |
| Serine                   | 0.80 ± 0.04 <sup>b</sup>  | 1.03 ± 0.06 <sup>a</sup>  | 0.23              |
| glutamic acid            | 2.97 ± 0.06 <sup>b</sup>  | 3.7 ± 0.04 <sup>a</sup>   | 0.73              |
| Glycine                  | 0.59 ± 0.09 <sup>b</sup>  | 0.81 ± 0.08 <sup>a</sup>  | 0.22              |
| Cystine                  | 0.40 ± 0.13 <sup>b</sup>  | 0.44 ± 0.11 <sup>a</sup>  | 0.04              |
| Proline                  | 0.99 ± 0.06 <sup>b</sup>  | 1.30 ± 0.08 <sup>a</sup>  | 0.31              |
| Total amino acid         | 15.79 ± 1.60 <sup>b</sup> | 19.49 ± 1.69 <sup>a</sup> | 3.7               |

Note: Different shoulder marked letters in the same row indicate significant differences (P<0.05).

**Table S2.** The relative abundance data for TOP10 bacteria at species level

| species name                                   | SL.B.0h | SL.B.48h | SL.B.96h |
|------------------------------------------------|---------|----------|----------|
| <i>Sugarcane phytoplasma</i> (uncharacterized) | 0.9008  | 0.0697   | 0.0737   |
| <i>Pediococcus acidilactici</i>                |         | 0.0283   | 0.8295   |
| <i>Bacillus subtilis</i>                       |         |          | 0.0052   |
| <i>Glycine soja</i>                            | 0.0046  | 0.0003   | 0.0012   |
| <i>Lactobacillus plantarum</i>                 |         |          | 0.0040   |
| <i>Aerococcus christensenii</i>                |         |          | 0.0039   |
| <i>Acetobacter pasteurianus</i>                |         |          | 0.0026   |
| <i>Zea mays</i>                                | 0.0017  |          |          |
| <i>Stenotrophomonas maltophilia</i>            |         |          | 0.0014   |
| <i>Pediococcus sp_L04</i>                      |         |          | 0.0005   |
| Others                                         | 0.0929  | 0.9016   | 0.0778   |

**Table S3.** The relative abundance data for TOP10 fungus at species level

| Species name                      | SL.B.0h | SL.B.48h | SL.B.96h |
|-----------------------------------|---------|----------|----------|
| <i>Saccharomyces cerevisiae</i>   |         | 0.2867   | 0.9848   |
| <i>Fungi sp.</i>                  | 0.8087  | 0.5868   | 0.0060   |
| <i>Aspergillus pseudoglaucus</i>  | 0.1444  | 0.0323   | 0.0013   |
| <i>Aspergillus penicillioides</i> | 0.0379  | 0.0180   | 0.0001   |
| <i>Chaetothyriales sp.</i>        |         | 0.0108   |          |
| <i>Chaetomiaceae sp.</i>          |         | 0.0090   |          |
| <i>Meyerozyma sp.</i>             |         |          | 0.0068   |
| <i>Byssochlamys spectabilis</i>   |         | 0.0056   |          |
| <i>Ascomycota sp.</i>             |         | 0.0044   |          |
| <i>Penicillium chrysogenum</i>    |         | 0.0036   |          |
| Others                            | 0.0090  | 0.0427   | 0.0012   |

**Table S4.** The Results of *Salmonella* test

| Item              | The method of detection | The result                                        |
|-------------------|-------------------------|---------------------------------------------------|
| <i>Salmonella</i> | GB13091-2018            | No <i>Salmonella</i> was detected in 25g samples. |

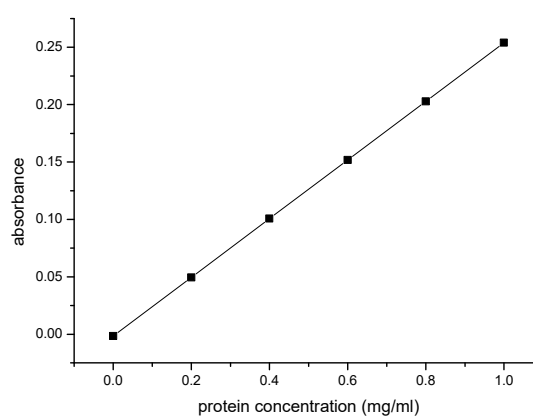**Figure S1.** The standard curve of proteins by biuret method.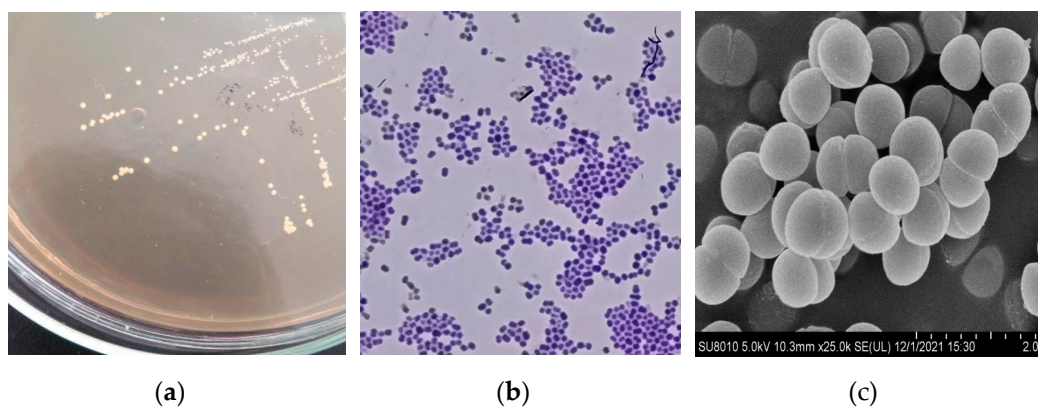**Figure S2.** Morphological picture of strain SLB-04. (a) Plate colony morphology; (b) Morphology of the cells under light microscope(×1000); (c) Morphology of the cells under electron microscope(×25000).

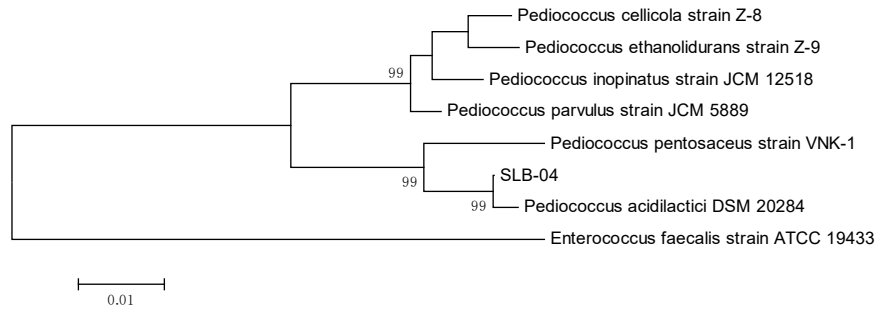

**Figure S3.** 16S rDNA phylogenetic tree constructed on the base of maximum likelihood method.
